# Supplementary material for: Applying Different Magnetic Water Densities as Irrigation for Aeroponically and Hydroponically Grown Strawberries
Source: MDPI journal article supplement (doi:10.3390/agriculture12060819), 2022-06-07
Supplement: s1 [file s1]

**Table S1.** The influence of soilless culture systems, irrigation water magnetic treatments, and their interaction on some plant growth parameters.

| Treatment                  | 2018                  |                       |                        |                     | 2019                 |                      |                        |                     |
|----------------------------|-----------------------|-----------------------|------------------------|---------------------|----------------------|----------------------|------------------------|---------------------|
|                            | Soilless culture (S)  |                       |                        |                     |                      |                      |                        |                     |
|                            | NFT                   | Tower<br>Aeroponic    | Pyramidal<br>Aeroponic | Mean                | NFT                  | Tower<br>Aeroponic   | Pyramidal<br>Aeroponic | Mean                |
| Number of leaves           |                       |                       |                        |                     |                      |                      |                        |                     |
| NW                         | 20.00 <sup>c</sup>    | 25.00 <sup>bc</sup>   | 24 <sup>bc</sup>       | 17.33 <sub>b</sub>  | 22.00 <sup>d</sup>   | 23.00 <sup>cd</sup>  | 21.00 <sup>d</sup>     | 22.00 <sup>b</sup>  |
| MWL1                       | 15.00 <sup>c</sup>    | 19.00 <sup>c</sup>    | 19.00 <sup>c</sup>     | 17.67 <sub>b</sub>  | 25.00 <sup>bcd</sup> | 25.00 <sup>bcd</sup> | 22.00 <sup>d</sup>     | 24.00 <sup>b</sup>  |
| MWL2                       | 16.00 <sup>c</sup>    | 18.00 <sup>c</sup>    | 18.00 <sup>c</sup>     | 23.00 <sub>ab</sub> | 23.00 <sup>cd</sup>  | 28.00 <sup>b</sup>   | 22.00 <sup>d</sup>     | 24.00 <sup>b</sup>  |
| MWL3                       | 33.00 <sup>ab</sup>   | 36.00 <sup>a</sup>    | 17.00 <sup>c</sup>     | 28.67 <sup>a</sup>  | 34.00 <sup>a</sup>   | 36.00 <sup>a</sup>   | 27.00 <sup>bc</sup>    | 32.33 <sup>a</sup>  |
| Mean                       | 21.00 <sup>a</sup>    | 24.50 <sup>a</sup>    | 19.50 <sup>a</sup>     |                     | 26.00 <sup>b</sup>   | 28.00 <sup>a</sup>   | 23.00 <sup>c</sup>     |                     |
| LSD 0.05                   | S<br>= 5.0026         | I<br>= 5.776          | S × I<br>= 10.01       |                     | S<br>= 1.93          | I<br>= 2.23          | S × I<br>= 3.86        |                     |
| Stem diameter (cm)         |                       |                       |                        |                     |                      |                      |                        |                     |
| NW                         | 0.92 <sup>b</sup>     | 1.01 <sup>ab</sup>    | 0.82 <sup>b</sup>      | 0.92 <sup>a</sup>   | 0.89 <sup>bc</sup>   | 0.92 <sup>bc</sup>   | 0.77 <sup>c</sup>      | 0.86 <sup>b</sup>   |
| MWL1                       | 0.95 <sup>b</sup>     | 1.09 <sup>ab</sup>    | 0.83 <sup>b</sup>      | 0.96 <sup>a</sup>   | 0.92 <sup>bc</sup>   | 0.93 <sup>bc</sup>   | 0.82 <sup>bc</sup>     | 0.89 <sup>b</sup>   |
| MWL2                       | 0.821 <sup>b</sup>    | 0.99 <sup>ab</sup>    | 0.84 <sup>b</sup>      | 0.88 <sup>a</sup>   | .95 <sup>bc</sup>    | 0.97 <sup>bc</sup>   | 0.95 <sup>bc</sup>     | 0.96 <sup>b</sup>   |
| MWL3                       | 1.05 <sup>ab</sup>    | 1.35 <sup>a</sup>     | 0.88 <sup>b</sup>      | 1.09 <sup>a</sup>   | 1.02 <sup>b</sup>    | 1.33 <sup>a</sup>    | 0.90 <sup>bc</sup>     | 1.09 <sup>a</sup>   |
| Mean                       | 0.94 <sup>ab</sup>    | 1.11 <sup>a</sup>     | 0.84 <sup>ab</sup>     |                     | 0.95 <sup>ab</sup>   | 1.04 <sup>a</sup>    | 0.86 <sup>b</sup>      |                     |
| LSD 0.05                   | S<br>= 0.2013         | I<br>= 0.1744         | S × I<br>= 0.3487      |                     | S<br>= 0.099         | I<br>= 0.115         | S × I<br>= 0.20        |                     |
| Plant height (cm)          |                       |                       |                        |                     |                      |                      |                        |                     |
| NW                         | 19.33 <sup>a</sup>    | 19.00 <sup>a</sup>    | 18.33 <sup>a</sup>     | 18.88 <sup>a</sup>  | 18 <sup>b</sup>      | 18.17 <sup>b</sup>   | 18.10 <sup>b</sup>     | 18.09 <sup>b</sup>  |
| MWL1                       | 18.67 <sup>a</sup>    | 20.00 <sup>a</sup>    | 20.00 <sup>a</sup>     | 19.05 <sup>a</sup>  | 19.50 <sup>ab</sup>  | 18.67 <sup>ab</sup>  | 18.33 <sup>ab</sup>    | 18.83 <sup>ab</sup> |
| MWL2                       | 17.66 <sup>a</sup>    | 20.83 <sup>a</sup>    | 18.67 <sup>a</sup>     | 19.55 <sup>a</sup>  | 19.83 <sup>ab</sup>  | 19.00 <sup>ab</sup>  | 18.50 <sup>ab</sup>    | 19.11 <sup>ab</sup> |
| MWL3                       | 19.67 <sup>a</sup>    | 20.00 <sup>a</sup>    | 20.33 <sup>a</sup>     | 20.00 <sup>a</sup>  | 20.33 <sup>a</sup>   | 19.33 <sup>ab</sup>  | 19.83 <sup>ab</sup>    | 19.83 <sup>a</sup>  |
| Mean                       | 18.83 <sup>a</sup>    | 19.96 <sup>a</sup>    | 19.33 <sup>a</sup>     |                     | 19.42 <sup>a</sup>   | 18.79 <sup>a</sup>   | 18.69 <sup>a</sup>     |                     |
| LSD 0.05                   | S<br>= 1.68           | I<br>= 1.944          | S × I<br>= 3.367       |                     | S<br>= 0.92          | I<br>= 1.06          | S × I<br>= 1.84        |                     |
| Number of fruits per plant |                       |                       |                        |                     |                      |                      |                        |                     |
| NW                         | 13.33 <sup>abcd</sup> | 12.67 <sup>d</sup>    | 13.00 <sup>cd</sup>    | 13.00 <sup>c</sup>  | 14.33 <sup>bc</sup>  | 15.00 <sup>abc</sup> | 13.66 <sup>c</sup>     | 14.33 <sup>a</sup>  |
| MWL1                       | 13.70 <sup>abcd</sup> | 14.00 <sup>abcd</sup> | 14.00 <sup>abcd</sup>  | 13.89 <sub>bc</sub> | 16.00 <sup>ab</sup>  | 14.67 <sup>abc</sup> | 14.66 <sup>abc</sup>   | 15.11 <sup>a</sup>  |
| MWL2                       | 14.67 <sup>abc</sup>  | 14.67 <sup>abc</sup>  | 13.33 <sup>abcd</sup>  | 14.22 <sub>ab</sub> | 16.33 <sup>a</sup>   | 14.67 <sup>abc</sup> | 14.00 <sup>c</sup>     | 15.00 <sup>a</sup>  |
| MWL3                       | 15.33 <sup>a</sup>    | 15.00 <sup>ab</sup>   | 14.67 <sup>abc</sup>   | 15.00 <sup>a</sup>  | 15.33 <sup>abc</sup> | 14.66 <sup>abc</sup> | 15.00 <sup>abc</sup>   | 15.00 <sup>a</sup>  |
| Mean                       | 14.25 <sup>a</sup>    | 14.08 <sup>a</sup>    | 13.75 <sup>a</sup>     |                     | 15.50 <sup>a</sup>   | 14.75 <sup>ab</sup>  | 14.33 <sup>b</sup>     |                     |
| LSD 0.05                   | S<br>= 0.8308         | I<br>= 0.9593         | S × I<br>= 1.662       |                     | S<br>= 0.79          | I<br>= 0.92          | S × I<br>= 1.59        |                     |
| Leaf area (cm²)            |                       |                       |                        |                     |                      |                      |                        |                     |
| NW                         | 17.81 <sup>a</sup>    | 19.89 <sup>a</sup>    | 18.75 <sup>a</sup>     | 18.82 <sup>a</sup>  | 21.14 <sup>fg</sup>  | 20.51 <sup>g</sup>   | 19.73 <sup>g</sup>     | 20.46 <sup>d</sup>  |

|                                         |                       |                       |                       |                     |                      |                      |                      |                     |
|-----------------------------------------|-----------------------|-----------------------|-----------------------|---------------------|----------------------|----------------------|----------------------|---------------------|
| MWL1                                    | 21.88 <sup>a</sup>    | 20.87 <sup>a</sup>    | 19.30 <sup>a</sup>    | 20.68 <sup>a</sup>  | 23.87 <sup>de</sup>  | 22.55 <sup>ef</sup>  | 24.67 <sup>d</sup>   | 23.70 <sup>c</sup>  |
| MWL2                                    | 19.88 <sup>a</sup>    | 21.65 <sup>a</sup>    | 20.09 <sup>a</sup>    | 20.54 <sup>a</sup>  | 23.91 <sup>de</sup>  | 25.71 <sup>cd</sup>  | 25.77 <sup>cd</sup>  | 25.13 <sup>b</sup>  |
| MWL3                                    | 21.91 <sup>a</sup>    | 23.74 <sup>a</sup>    | 17.47 <sup>a</sup>    | 21.04 <sup>a</sup>  | 28.90 <sup>a</sup>   | 28.21 <sup>ab</sup>  | 26.88 <sup>bc</sup>  | 27.99 <sup>a</sup>  |
| Mean                                    | 20.37 <sup>a</sup>    | 21.54 <sup>a</sup>    | 18.90 <sup>a</sup>    |                     | 24.46 <sup>a</sup>   | 24.25 <sup>a</sup>   | 24.26 <sup>a</sup>   |                     |
| LSD 0.05                                | S<br>= 3.7216         | I<br>= 4.2973         | S × I<br>= 7.443      |                     | S<br>= 0.90          | I<br>= 1.03          | S × I<br>= 1.79      |                     |
| <b>Fruit volume (cm<sup>3</sup>)</b>    |                       |                       |                       |                     |                      |                      |                      |                     |
| NW                                      | 13.37 <sup>cd</sup>   | 15.60 <sup>bc</sup>   | 10.40 <sup>d</sup>    | 13.12 <sup>c</sup>  | 13.63 <sup>de</sup>  | 14.73 <sup>cde</sup> | 11.13 <sup>e</sup>   | 13.16 <sup>c</sup>  |
| MWL1                                    | 12.83 <sup>cd</sup>   | 16.40 <sup>bc</sup>   | 13.93 <sup>bc</sup>   | 14.39 <sup>bc</sup> | 14.60 <sup>cde</sup> | 14.93 <sup>cde</sup> | 14.90 <sup>cde</sup> | 14.81 <sup>bc</sup> |
| MWL2                                    | 14.07 <sup>bc</sup>   | 17.27 <sup>ab</sup>   | 14.00 <sup>bc</sup>   | 15.11 <sup>ab</sup> | 16.43 <sup>cd</sup>  | 18.30 <sup>bc</sup>  | 15.90 <sup>cd</sup>  | 16.88 <sup>b</sup>  |
| MWL3                                    | 15.27 <sup>bc</sup>   | 20.17 <sup>a</sup>    | 14.03 <sup>bc</sup>   | 16.49 <sup>a</sup>  | 20.80 <sup>b</sup>   | 25.37 <sup>a</sup>   | 16.93 <sup>bcd</sup> | 21.03 <sup>a</sup>  |
| Mean                                    | 13.88 <sup>b</sup>    | 17.36 <sup>a</sup>    | 13.09 <sup>b</sup>    |                     | 16.37 <sup>b</sup>   | 18.33 <sup>a</sup>   | 14.72 <sup>b</sup>   |                     |
| LSD 0.05                                | S<br>= 1.833          | I<br>= 1.5877         | S × I<br>= 3.175      |                     | S<br>= 1.84          | I<br>= 2.13          | S × I<br>= 3.68      |                     |
| <b>Fruit weight (g)</b>                 |                       |                       |                       |                     |                      |                      |                      |                     |
| NW                                      | 12.57 <sup>de</sup>   | 14.35 <sup>cde</sup>  | 11.79 <sup>e</sup>    | 12.90 <sup>b</sup>  | 14.45 <sup>de</sup>  | 15.99 <sup>cde</sup> | 12.32 <sup>e</sup>   | 14.25 <sup>c</sup>  |
| MWL1                                    | 14.02 <sup>cde</sup>  | 16.11 <sup>bcd</sup>  | 14.45 <sup>cde</sup>  | 14.86 <sup>b</sup>  | 15.58 <sup>cde</sup> | 16.69 <sup>cde</sup> | 16.08 <sup>cde</sup> | 16.12 <sup>bc</sup> |
| MWL2                                    | 15.24 <sup>cde</sup>  | 19.12 <sup>ab</sup>   | 15.32 <sup>cde</sup>  | 16.56 <sup>ab</sup> | 17.88 <sup>cd</sup>  | 19.40 <sup>bc</sup>  | 17.27 <sup>cd</sup>  | 18.18 <sup>b</sup>  |
| MWL3                                    | 17.24 <sup>bc</sup>   | 21.92 <sup>a</sup>    | 15.19 <sup>cde</sup>  | 18.12 <sup>a</sup>  | 23.40 <sup>ab</sup>  | 27.06 <sup>a</sup>   | 18.64 <sup>cd</sup>  | 23.03 <sup>a</sup>  |
| Mean                                    | 14.77 <sup>b</sup>    | 17.88 <sup>a</sup>    | 14.19 <sup>b</sup>    |                     | 17.83 <sup>ab</sup>  | 19.79 <sup>a</sup>   | 16.08 <sup>b</sup>   |                     |
| LSD 0.05                                | S<br>= 1.628          | I<br>= 1.881          | S × I<br>= 3.256      |                     | S<br>= 2.07          | I<br>= 2.39          | S × I<br>= 4.15      |                     |
| <b>Total fruit weight per plant (g)</b> |                       |                       |                       |                     |                      |                      |                      |                     |
| NW                                      | 167.30 <sup>de</sup>  | 181.88 <sup>de</sup>  | 153.33 <sup>e</sup>   | 167.50 <sup>c</sup> | 207.38 <sup>cd</sup> | 239.63 <sup>bc</sup> | 168.47 <sup>d</sup>  | 205.16 <sup>c</sup> |
| MWL1                                    | 192.30 <sup>de</sup>  | 225.12 <sup>bcd</sup> | 200.87 <sup>cde</sup> | 206.10 <sup>b</sup> | 249.18 <sup>bc</sup> | 244.30 <sup>bc</sup> | 236.20 <sup>bc</sup> | 243.23 <sup>b</sup> |
| MWL2                                    | 255.85 <sup>bcd</sup> | 281.19 <sup>ab</sup>  | 203.07 <sup>cde</sup> | 236.70 <sup>b</sup> | 292.18 <sup>b</sup>  | 284.99 <sup>b</sup>  | 242.23 <sup>bc</sup> | 273.13 <sup>b</sup> |
| MWL3                                    | 264.05 <sup>bc</sup>  | 329.14 <sup>a</sup>   | 223.70 <sup>bcd</sup> | 272.30 <sup>a</sup> | 354.87 <sup>a</sup>  | 392.37 <sup>a</sup>  | 281.13 <sup>b</sup>  | 342.79 <sup>a</sup> |
| Mean                                    | 212.37 <sup>b</sup>   | 254.33 <sup>a</sup>   | 195.25 <sup>b</sup>   |                     | 275.90 <sup>a</sup>  | 290.32 <sup>a</sup>  | 232.01 <sup>b</sup>  |                     |
| LSD 0.05                                | S = 28.175            | I =<br>32.533         | S × I<br>= 56.35      |                     | S = 26.85            | I = 31.01            | S × I<br>= 53.71     |                     |

Note: S is the soilless culture, and I is the irrigation treatment. Means followed by the same letter are not significantly different from one another based on Duncan's protected LSD test ( $P \leq 0.05$ ). NFT is the nutrient film technique hydroponic system, NW is natural water without magnetic or control, MWL1 is magnetic water level 1, MWL2 is magnetic water level 2, MWL3 is magnetic water level 3.
